# Supplementary material for: Synthesis and structures of diaryloxystannylenes and -plumbylenes embedded in 1,3-diethers of thiacalix[4]arene
Source: Royal Society of Chemistry journal article supplement (doi:10.1039/d0dt02496a), 2020-01-01
Supplement: d0dt02496a1.pdf [file d0dt02496a1.pdf]

Supporting information for

**Synthesis and Structures of Diaryloxystannylenes and -plumbylenes  
embedded in 1,3-Diethers of Thiacalix[4]arene**

Ryunosuke Kuriki, Takuya Kuwabara,\* and Youichi Ishii\*

Department of Applied Chemistry, Faculty of Science and Engineering, Chuo University, 1-13-27, Kasuga, Bunkyo-ku, Tokyo 112-8551,  
Japan

Table of contents

|                                                                                                                                                                              |       |
|------------------------------------------------------------------------------------------------------------------------------------------------------------------------------|-------|
| 1. Details for the X-ray diffraction analysis                                                                                                                                | S1    |
| 2. Molecular structures of thiacalix <sup>t-Bu</sup> (OH) <sub>2</sub> (OSi <sup>i</sup> Pr <sub>3</sub> ) <sub>2</sub> ( <b>4</b> )                                         | S2    |
| 3. X-ray crystallographic data for <b>2-Sn</b> , <b>2-Pb</b> , <b>4</b> , <b>5-Sn</b> , and <b>5-Pb</b>                                                                      | S3    |
| 4. <sup>1</sup> H, <sup>13</sup> C{ <sup>1</sup> H}, <sup>29</sup> Si{ <sup>1</sup> H}, <sup>119</sup> Sn{ <sup>1</sup> H} and <sup>207</sup> Pb NMR spectra of the products | S4–12 |
| 5. References                                                                                                                                                                | S13   |

## 1. Details for the X-ray diffraction analysis

Diffraction data for **2-Sn**, **2-Pb**, **4**, **5-Sn**, and **5-Pb** were collected on a VariMax Saturn CCD diffractometer with graphite-monochromated Mo K $\alpha$  radiation ( $\lambda = 0.71075 \text{ \AA}$ ) at  $-180 \text{ }^{\circ}\text{C}$ . Intensity data were corrected for Lorentz-polarization effects and for empirical absorption (REQAB).<sup>1</sup> All calculations were performed using the CrystalStructure<sup>2</sup> crystallographic software package except for refinements, which were performed using SHELXL-2018/3.<sup>3</sup> All non-hydrogen atoms were refined on  $F_o^2$  anisotropically by full-matrix least-square techniques. All hydrogen atoms were placed at the calculated positions with fixed isotropic parameters.

2. Molecular structures of thiacalix<sup>t-Bu</sup>(OH)<sub>2</sub>(OSi<sup>i</sup>Pr<sub>3</sub>)<sub>2</sub> (**4**).

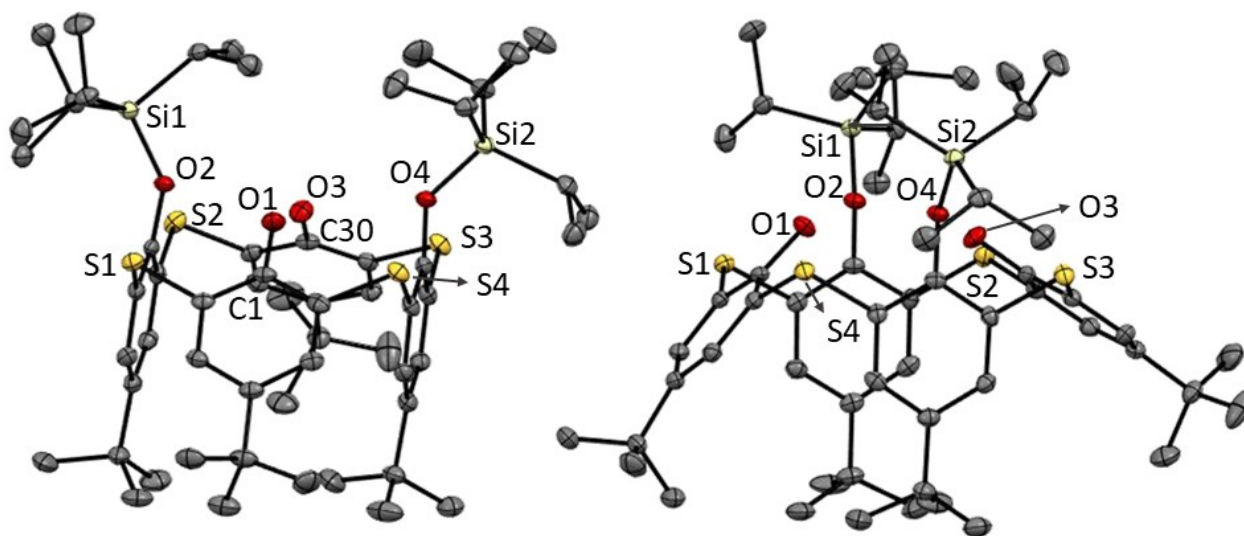

**Figure S1.** Molecular structures of **4** with thermal ellipsoid plots at 30 % probability. All hydrogen atoms and a THF molecule are omitted for clarity. Selected bond lengths [Å]: C1–O1 1.359(3); C30–O2 1.358(3).

### 3. X-ray crystallographic data for 2-Sn, 2-Pb, 4, 5-Sn, and 5-Pb.

**Table S1.** X-ray crystallographic data.

|                                                                 | 2-Sn·(Tol) <sub>3</sub>                                          | 2-Pb·(Tol)                                                      | 4·(THF)                                                                       | 5-Sn                                                                             | 6-Pb·(C <sub>5</sub> H <sub>12</sub> ) <sub>2</sub>                                             |
|-----------------------------------------------------------------|------------------------------------------------------------------|-----------------------------------------------------------------|-------------------------------------------------------------------------------|----------------------------------------------------------------------------------|-------------------------------------------------------------------------------------------------|
| CCDC                                                            | 2016537                                                          | 2021967                                                         | 2021969                                                                       | 2016539                                                                          | 2021968                                                                                         |
| formula                                                         | C <sub>75</sub> H <sub>82</sub> O <sub>4</sub> S <sub>4</sub> Sn | C <sub>61</sub> H <sub>66</sub> O <sub>4</sub> PbS <sub>4</sub> | C <sub>62</sub> H <sub>96</sub> O <sub>5</sub> S <sub>4</sub> Si <sub>2</sub> | C <sub>58</sub> H <sub>86</sub> O <sub>4</sub> S <sub>4</sub> Si <sub>2</sub> Sn | C <sub>131</sub> H <sub>208</sub> O <sub>8</sub> Pb <sub>2</sub> S <sub>8</sub> Si <sub>4</sub> |
| fw                                                              | 1294.33                                                          | 1198.56                                                         | 1105.8                                                                        | 1150.37                                                                          | 2694.18                                                                                         |
| crystal dimension                                               | 0.17 × 0.15 × 0.05                                               | 0.14 × 0.14 × 0.09                                              | 0.16 × 0.14 × 0.06                                                            | 0.18 × 0.17 × 0.10                                                               | 0.18 × 0.17 × 0.15                                                                              |
| crystal system                                                  | triclinic                                                        | monoclinic                                                      | triclinic                                                                     | monoclinic                                                                       | triclinic                                                                                       |
| space group                                                     | <i>P</i> -1                                                      | <i>C</i> 2/ <i>c</i>                                            | <i>P</i> -1                                                                   | <i>P</i> 2 <sub>1</sub> / <i>c</i>                                               | <i>P</i> -1                                                                                     |
| <i>a</i> [Å]                                                    | 12.094(3)                                                        | 22.413(3)                                                       | 13.510(2)                                                                     | 13.3770(12)                                                                      | 13.4391(8)                                                                                      |
| <i>b</i> [Å]                                                    | 12.497(3)                                                        | 20.959(2)                                                       | 15.106(2)                                                                     | 17.7497(15)                                                                      | 13.7334(7)                                                                                      |
| <i>c</i> [Å]                                                    | 22.902(6)                                                        | 12.5139(14)                                                     | 16.040(2)                                                                     | 25.887(2)                                                                        | 20.3149(10)                                                                                     |
| $\alpha$ [deg]                                                  | 83.617(10)                                                       | 90                                                              | 79.593(5)                                                                     | 90                                                                               | 71.319(3)                                                                                       |
| $\beta$ [deg]                                                   | 85.056(11)                                                       | 108.6460(10)                                                    | 81.074(4)                                                                     | 102.696(2)                                                                       | 77.604(3)                                                                                       |
| $\gamma$ [deg]                                                  | 75.959(9)                                                        | 90                                                              | 89.230(6)                                                                     | 90                                                                               | 77.966(3)                                                                                       |
| <i>V</i> [Å <sup>3</sup> ]                                      | 3330.9(15)                                                       | 5570.1(11)                                                      | 3180.1(8)                                                                     | 5996.3(9)                                                                        | 3429.3(3)                                                                                       |
| <i>Z</i>                                                        | 2                                                                | 4                                                               | 2                                                                             | 4                                                                                | 1                                                                                               |
| $\rho_{\text{calcd}}$ [g cm <sup>-3</sup> ]                     | 1.29                                                             | 1.429                                                           | 1.155                                                                         | 1.274                                                                            | 1.305                                                                                           |
| <i>F</i> (000)                                                  | 1356                                                             | 2440                                                            | 1200                                                                          | 2432                                                                             | 1406                                                                                            |
| $\mu$ [cm <sup>-1</sup> ]                                       | 5.57                                                             | 32.24                                                           | 2.32                                                                          | 6.48                                                                             | 26.59                                                                                           |
| transmission                                                    |                                                                  |                                                                 |                                                                               |                                                                                  |                                                                                                 |
| factors                                                         | 0.8455 – 1                                                       | 0.8697 – 1                                                      | 0.8616 – 1                                                                    | 0.8793 – 1                                                                       | 0.8718 – 1                                                                                      |
| range                                                           |                                                                  |                                                                 |                                                                               |                                                                                  |                                                                                                 |
| index range                                                     | -15 ≤ <i>h</i> ≤ 13                                              | -28 ≤ <i>h</i> ≤ 22                                             | -17 ≤ <i>h</i> ≤ 17                                                           | -17 ≤ <i>h</i> ≤ 17                                                              | -11 ≤ <i>h</i> ≤ 16                                                                             |
|                                                                 | -16 ≤ <i>k</i> ≤ 15                                              | -27 ≤ <i>k</i> ≤ 26                                             | -16 ≤ <i>k</i> ≤ 19                                                           | -22 ≤ <i>k</i> ≤ 23                                                              | -16 ≤ <i>k</i> ≤ 16                                                                             |
|                                                                 | -29 ≤ <i>l</i> ≤ 29                                              | -16 ≤ <i>l</i> ≤ 16                                             | -15 ≤ <i>l</i> ≤ 20                                                           | -33 ≤ <i>l</i> ≤ 29                                                              | -25 ≤ <i>l</i> ≤ 25                                                                             |
| no. reflections                                                 | 26547                                                            | 22455                                                           | 26240                                                                         | 48104                                                                            | 25173                                                                                           |
| unique ( <i>R</i> <sub>int</sub> )                              | 14566 (0.0636)                                                   | 6294 (0.0366)                                                   | 14039 (0.0411)                                                                | 13722 (0.0396)                                                                   | 13148 (0.0316)                                                                                  |
| <i>I</i> > 2σ( <i>I</i> )                                       | 11317                                                            | 5736                                                            | 10139                                                                         | 11958                                                                            | 11126                                                                                           |
| no. parameters                                                  | 795                                                              | 338                                                             | 684                                                                           | 646                                                                              | 742                                                                                             |
| <i>R</i> <sub>1</sub> ( <i>I</i> > 2σ( <i>I</i> )) <sup>a</sup> | 0.0851                                                           | 0.0319                                                          | 0.0598                                                                        | 0.0372                                                                           | 0.0271                                                                                          |
| <i>wR</i> <sub>2</sub> (all data) <sup>b</sup>                  | 0.1827                                                           | 0.0695                                                          | 0.1488                                                                        | 0.0899                                                                           | 0.0683                                                                                          |
| GOF <sup>c</sup>                                                | 1.098                                                            | 1.117                                                           | 1.083                                                                         | 1.118                                                                            | 1.06                                                                                            |
| max diff peak<br>/ hole [e Å <sup>-3</sup> ]                    | 1.297/-1.222                                                     | 1.5/-1.746                                                      | 0.475/-0.454                                                                  | 0.48/-0.989                                                                      | 1.635/-1.413                                                                                    |

<sup>a</sup>  $R_1 = \sum ||F_o| - |F_c|| / \sum |F_o|$ . <sup>b</sup>  $wR_2 = [\sum \{w(F_o^2 - F_c^2)^2\} / \sum w(F_o^2)^2]^{1/2}$ ,  $w = 1/[\sigma^2 F_o^2 + (aP)^2 + bP]$  (*a* and *b* are constants suggested by the refinement program;  $P = [\max(F_o^2, 0) + 2F_c^2]/3$ ). <sup>c</sup> GOF =  $[\sum w(F_o^2 - F_c^2)^2 / (N_{\text{obs}} - N_{\text{params}})]^{1/2}$ .

#### 4. $^1\text{H}$ and $^{13}\text{C}\{^1\text{H}\}$ NMR spectra of the products

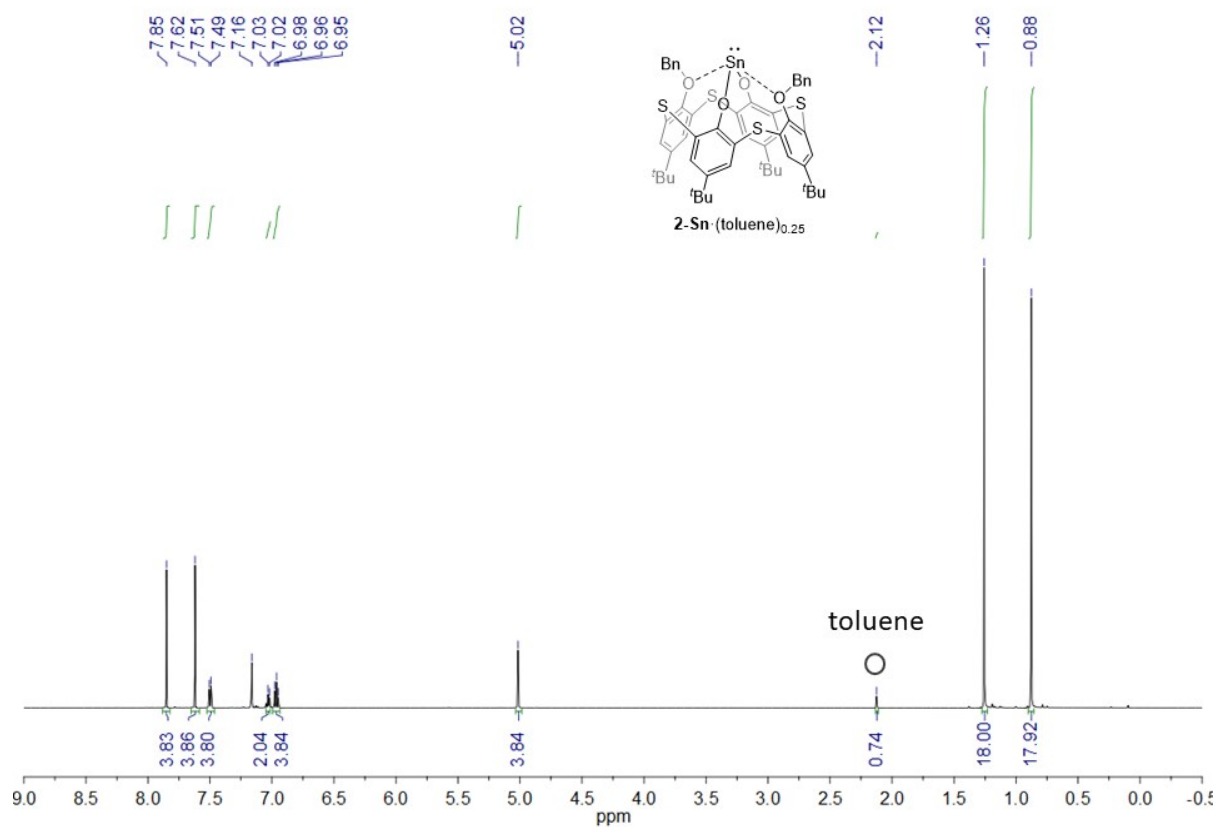

Figure S2.  $^1\text{H}$  NMR spectrum of  $2\text{-Sn}\cdot(\text{toluene})_{0.25}$  recorded at 50 °C.

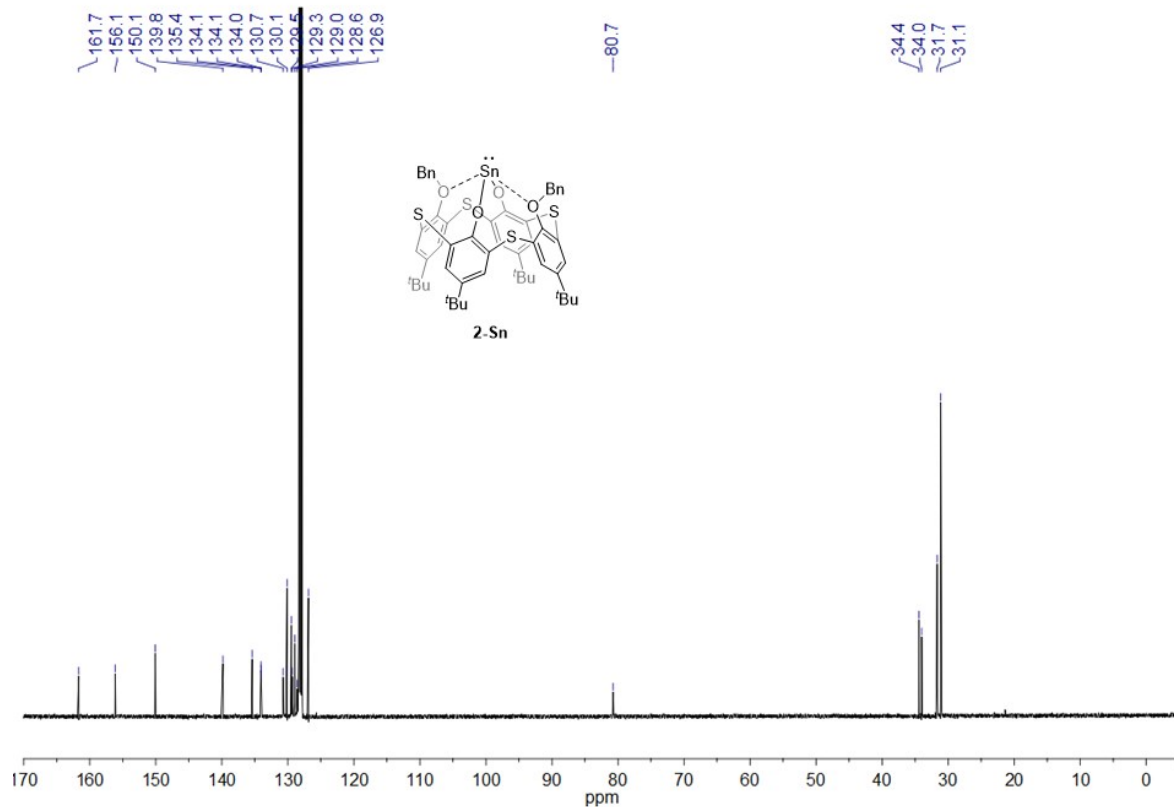

Figure S3.  $^{13}\text{C}\{^1\text{H}\}$  NMR spectrum of  $2\text{-Sn}$  recorded at 50 °C.

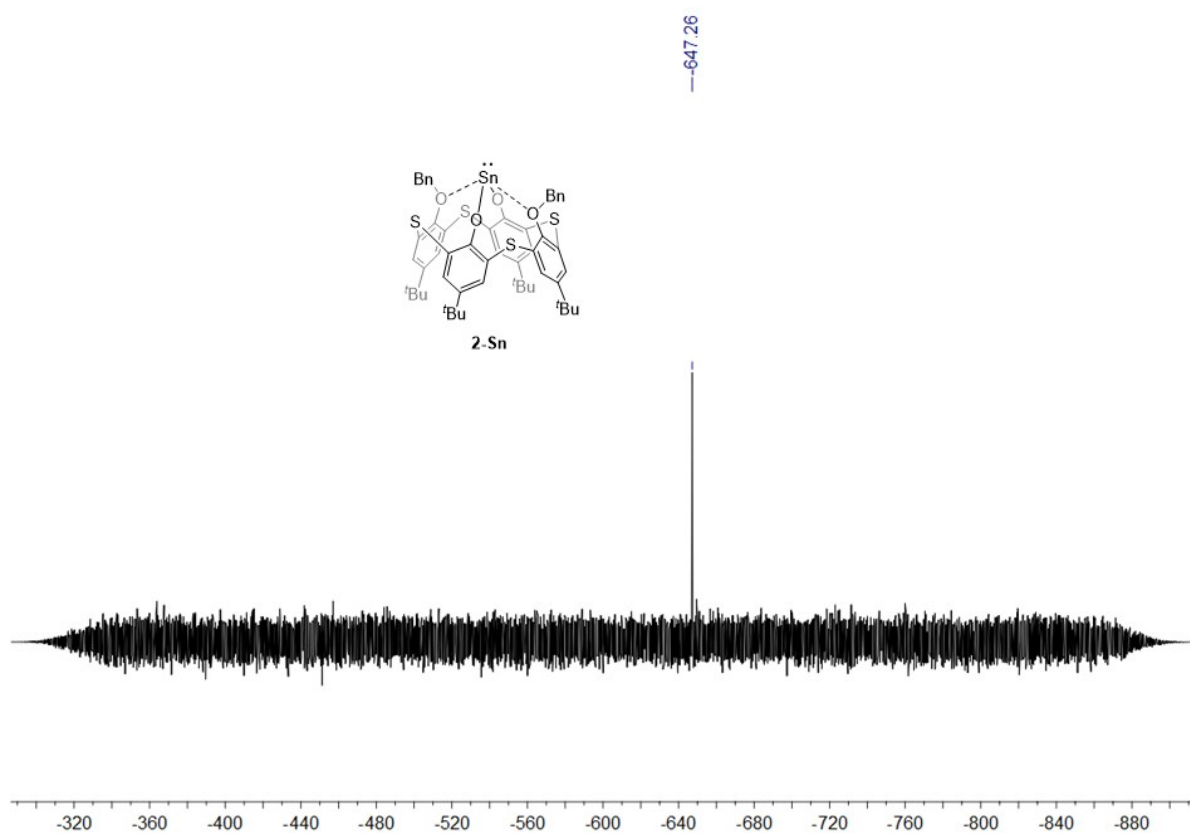

**Figure S4.**  $^{119}\text{Sn}\{^1\text{H}\}$  NMR spectrum of **2-Sn** recorded at 50 °C.

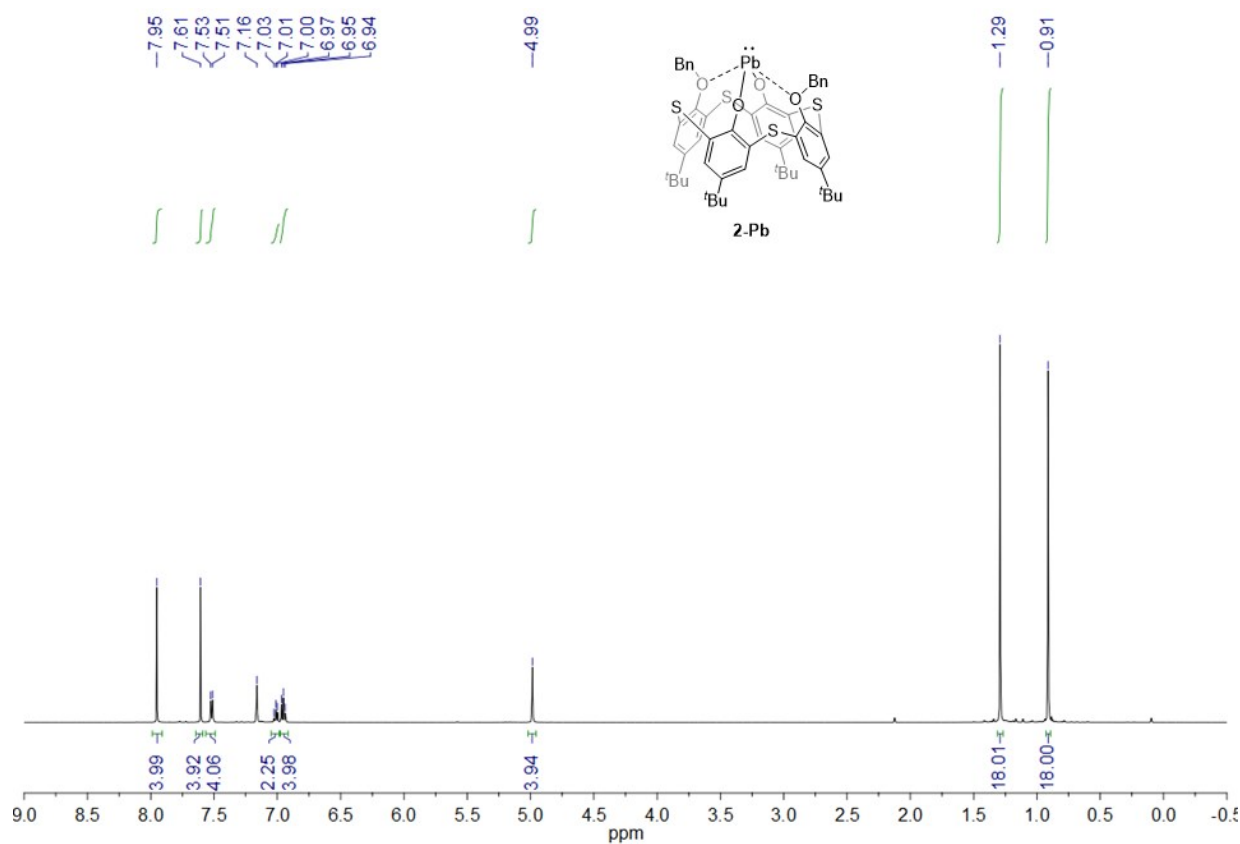

**Figure S5.**  $^1\text{H}$  NMR spectrum of **2-Pb** recorded at 50 °C.

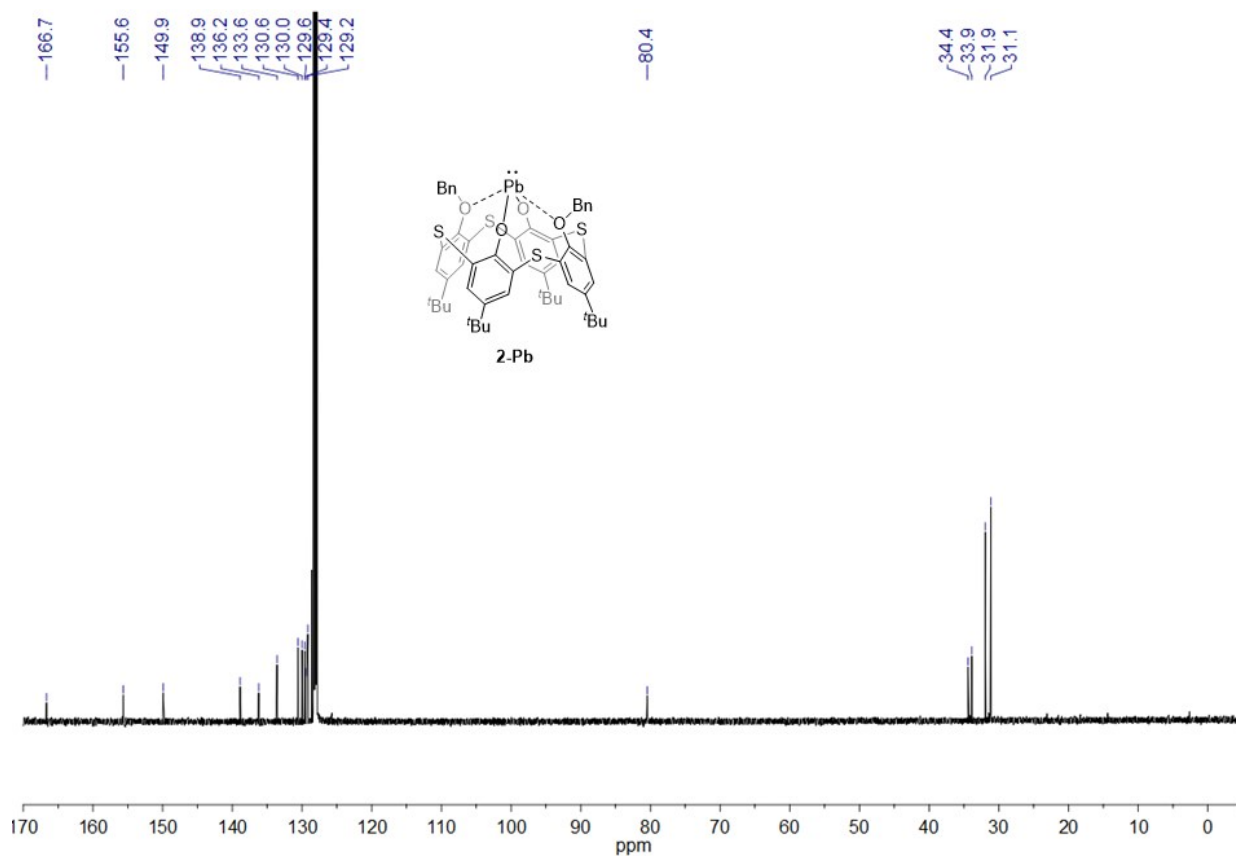

**Figure S6.**  $^{13}\text{C}\{^1\text{H}\}$  NMR spectrum of **2-Pb** recorded at 50 °C.

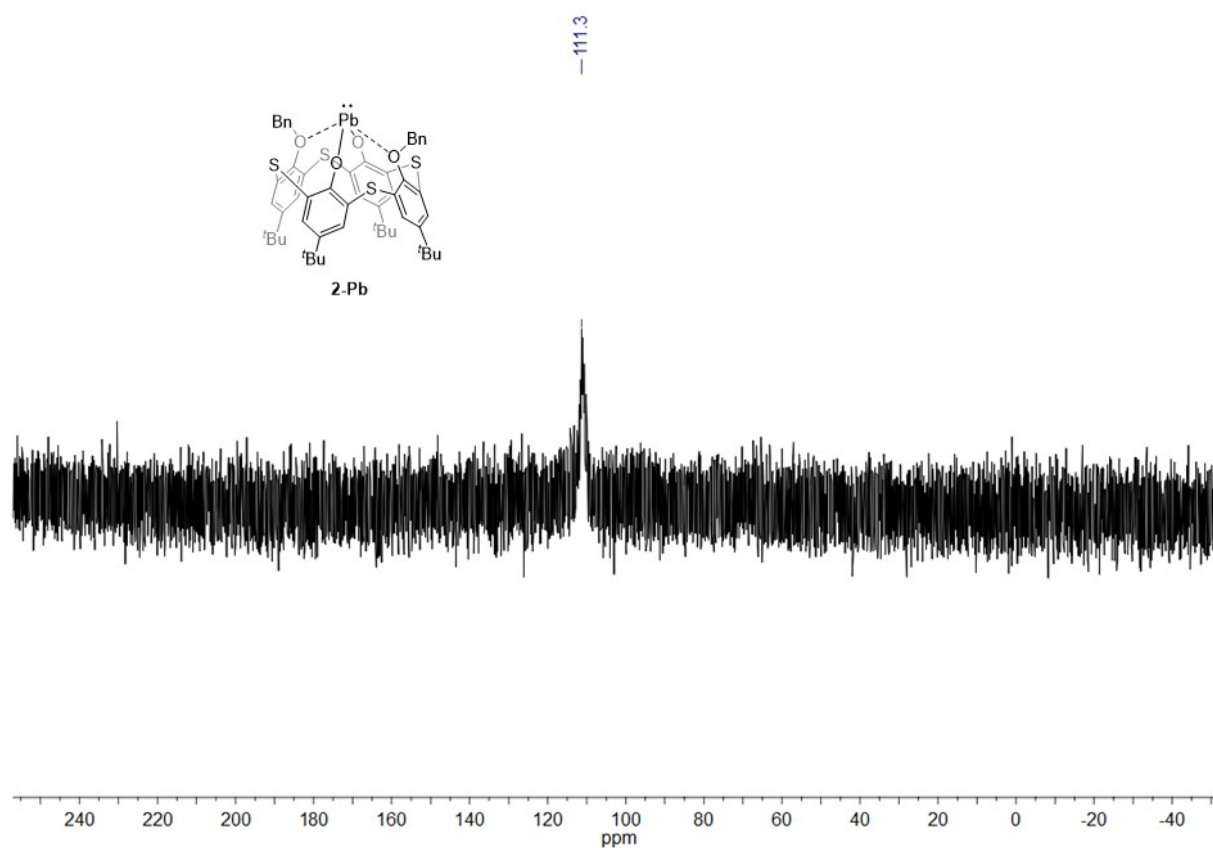

**Figure S7.**  $^{207}\text{Pb}$  NMR spectrum of **2-Pb** recorded at 50 °C.

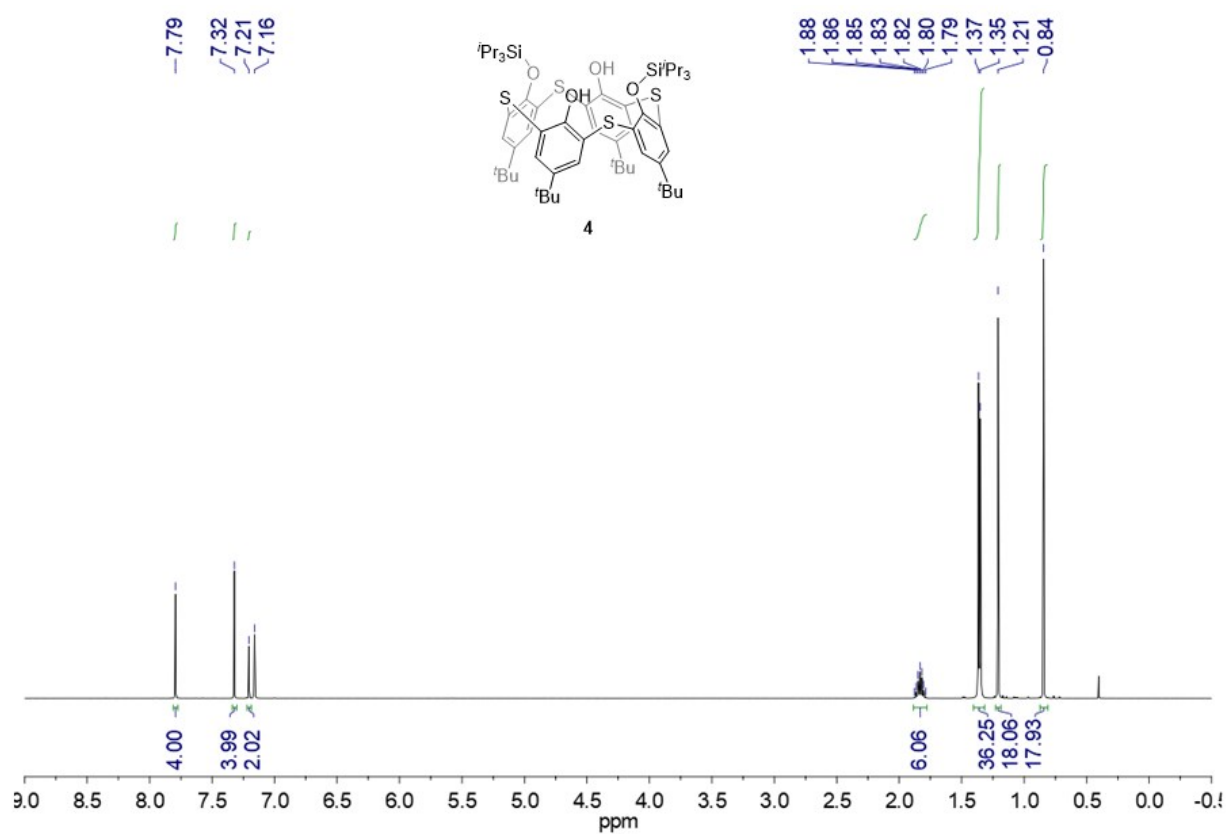

**Figure S8.** <sup>1</sup>H NMR spectrum of **4**.

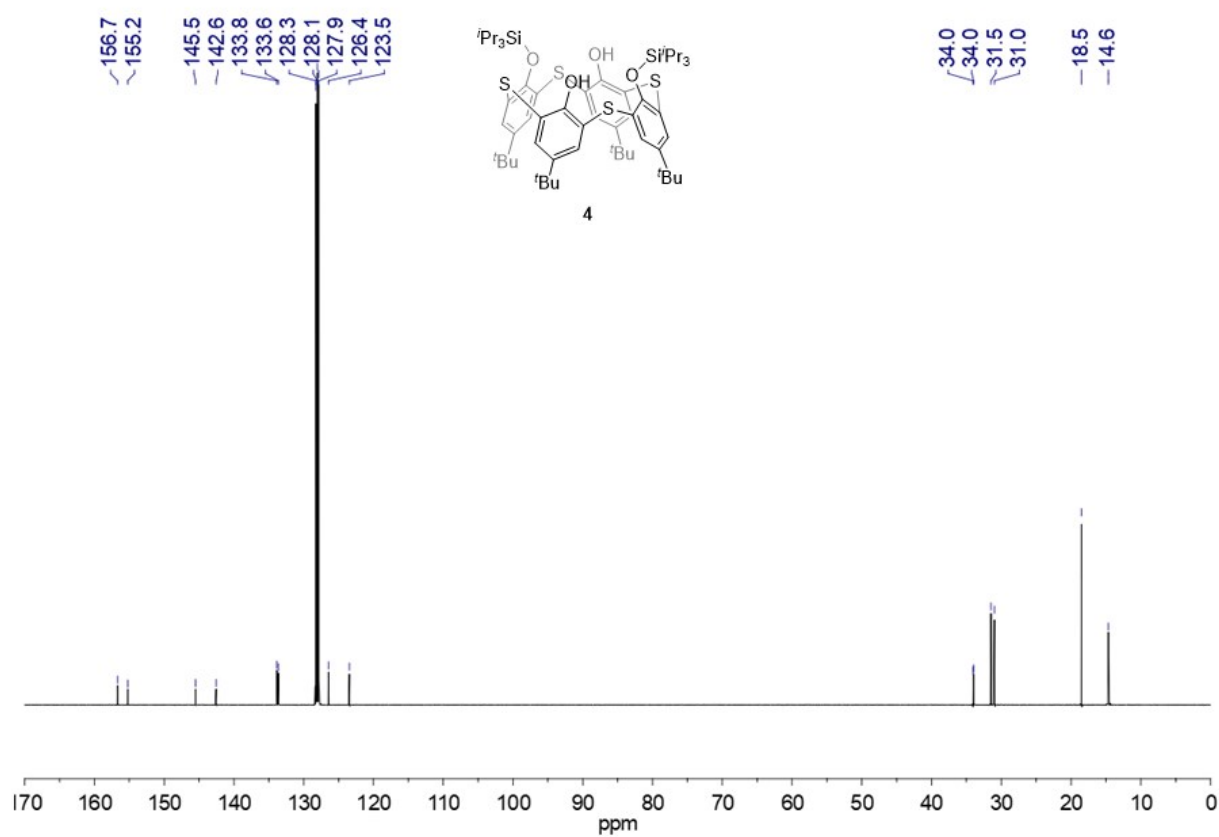

**Figure S9.** <sup>13</sup>C{<sup>1</sup>H} NMR spectrum of **4**.



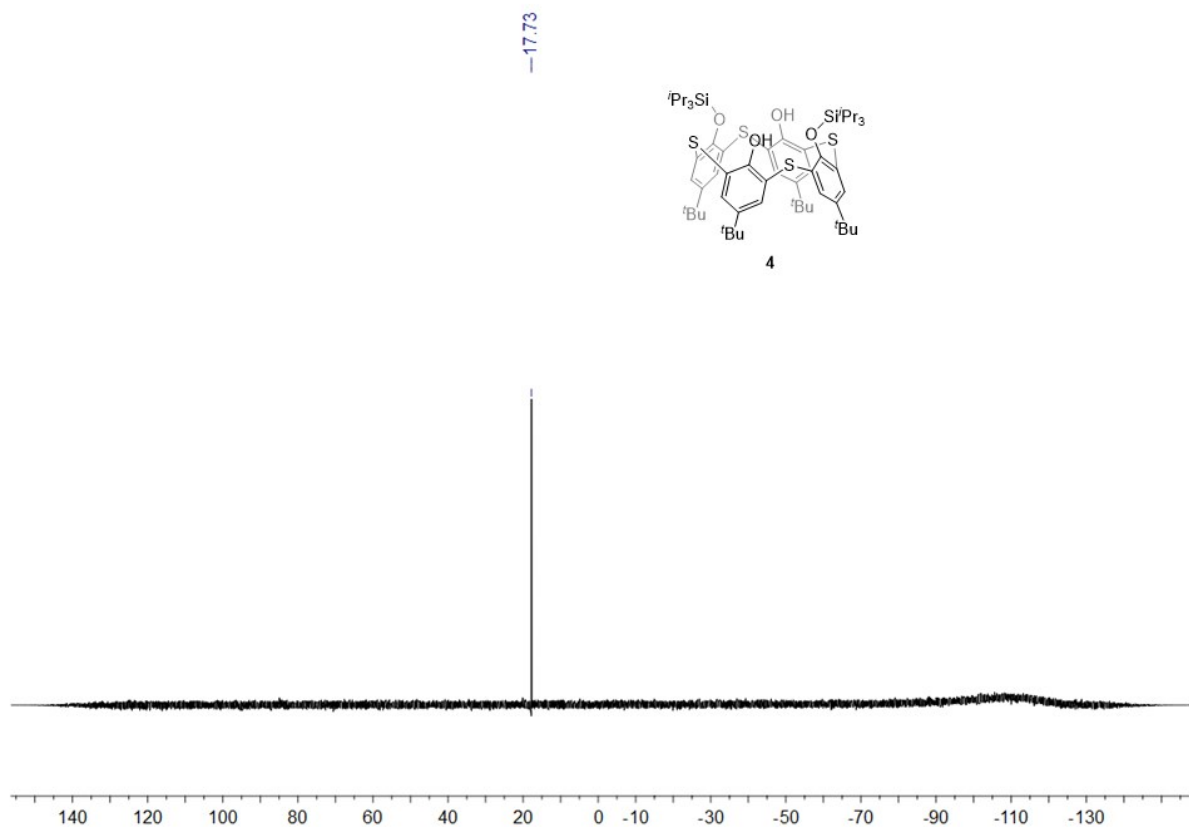

Figure S10.  $^{29}\text{Si}\{^1\text{H}\}$  NMR spectrum of **4**.

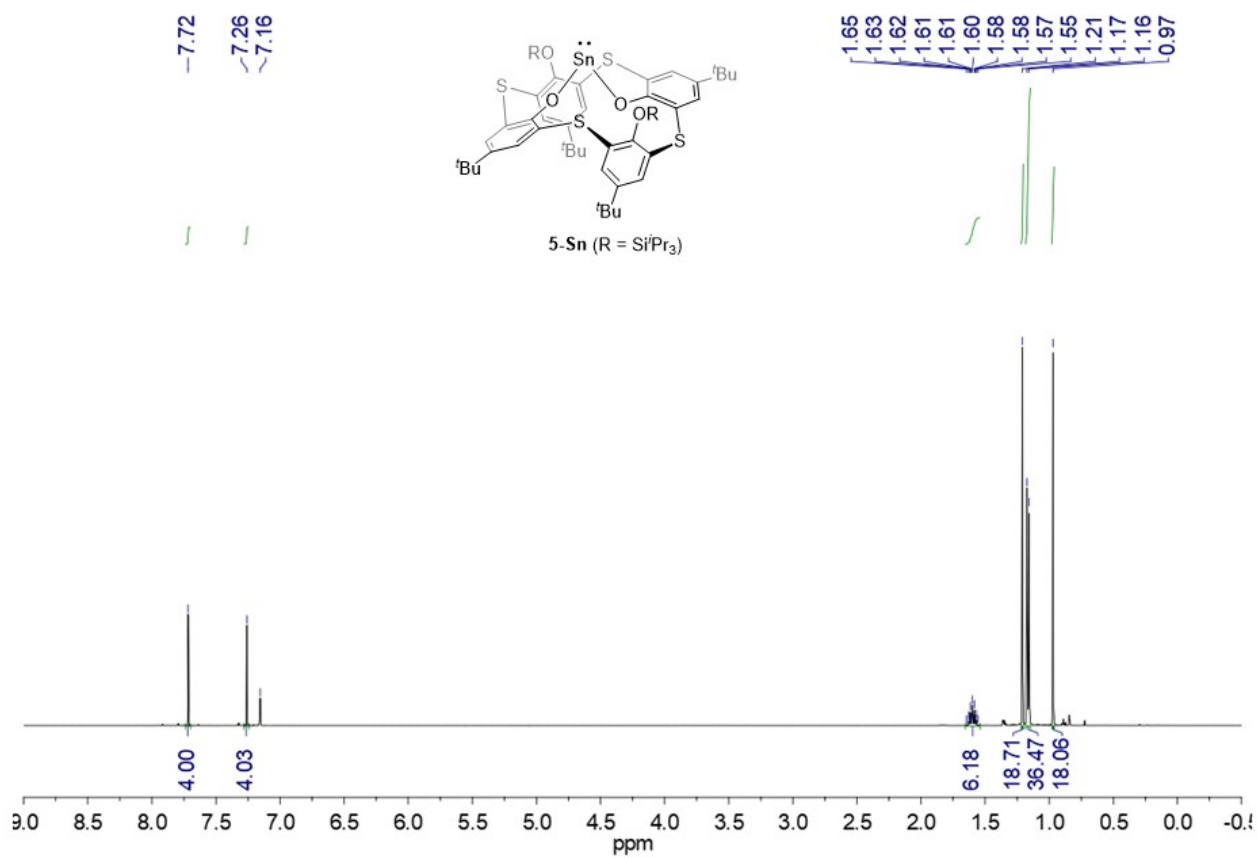

Figure S11.  $^1\text{H}$  NMR spectrum of **5-Sn**.

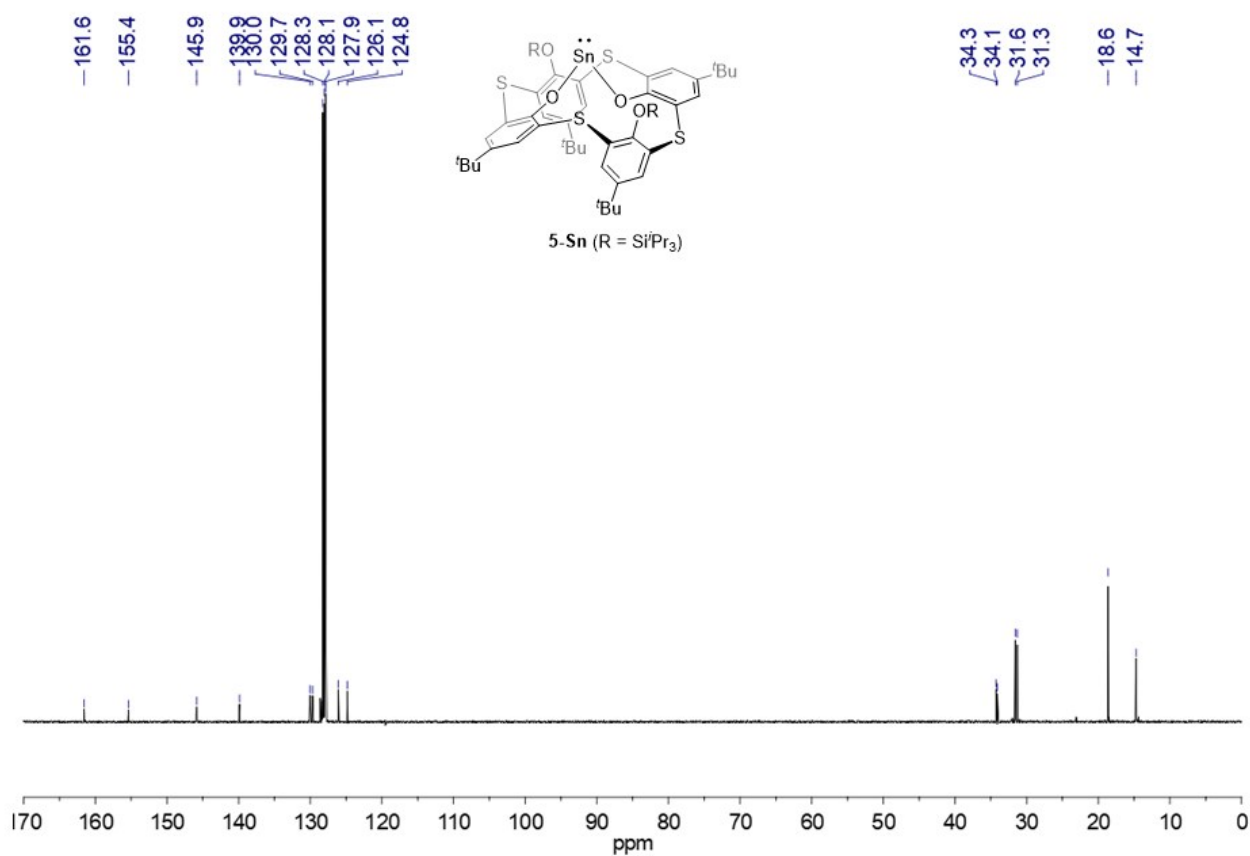

**Figure S12.**  $^{13}\text{C}\{^1\text{H}\}$  NMR spectrum of **5-Sn**.

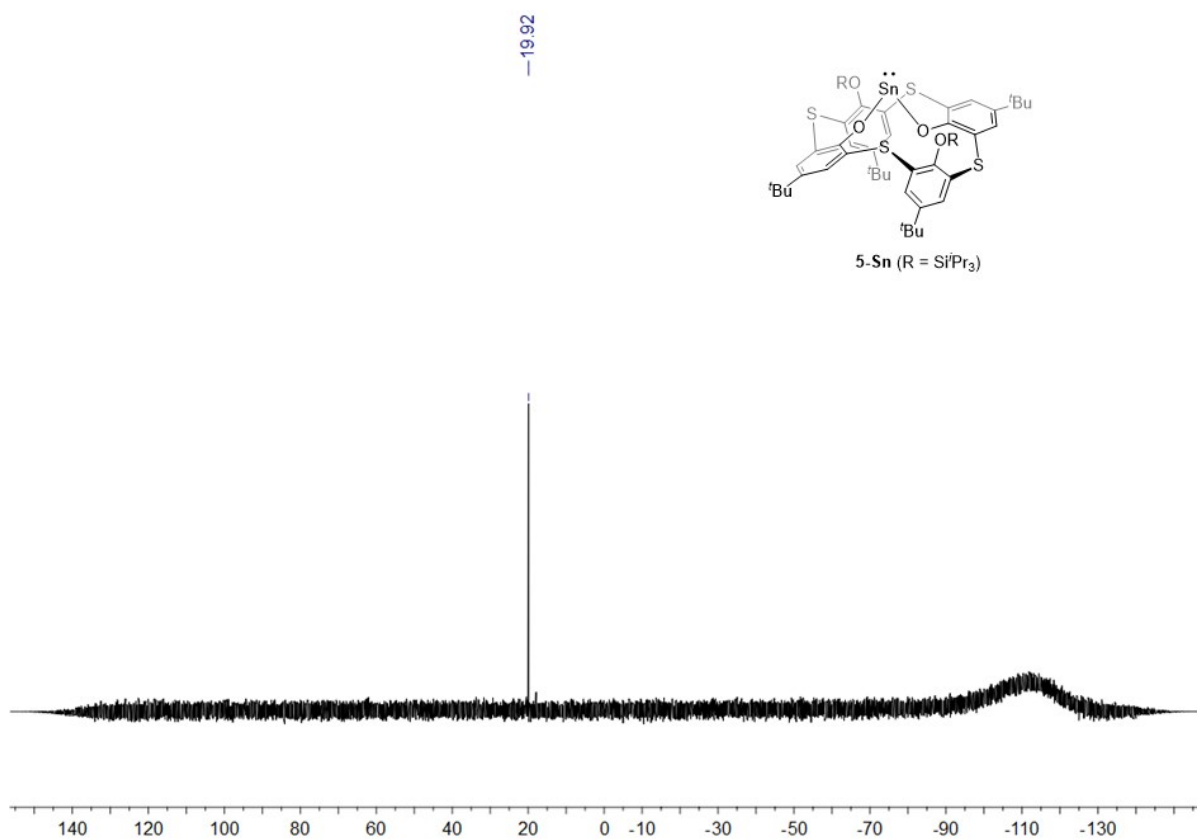

**Figure S13.**  $^{29}\text{Si}\{^1\text{H}\}$  NMR spectrum of **5-Sn**.

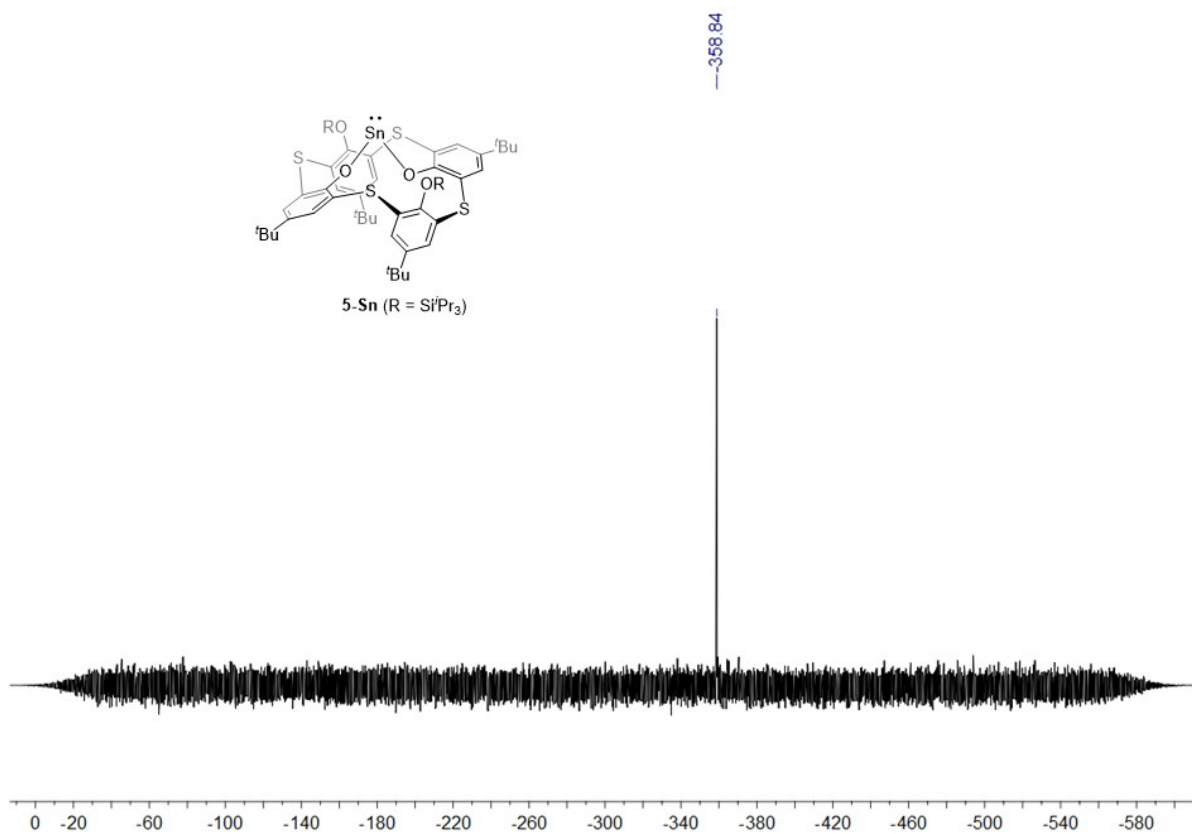

**Figure S14.**  $^{119}\text{Sn}\{^1\text{H}\}$  NMR spectrum of **5-Sn**.

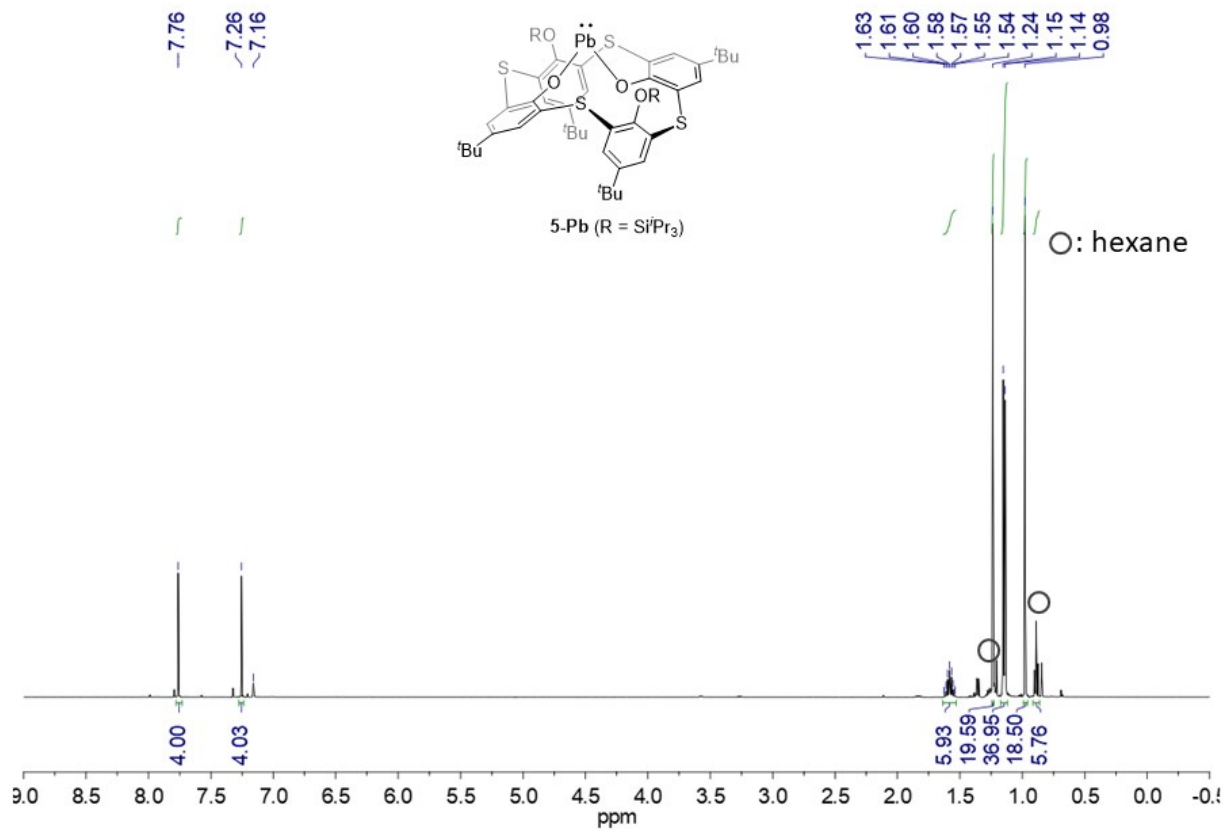

**Figure S15.**  $^1\text{H}$  NMR spectrum of **5-Pb**.

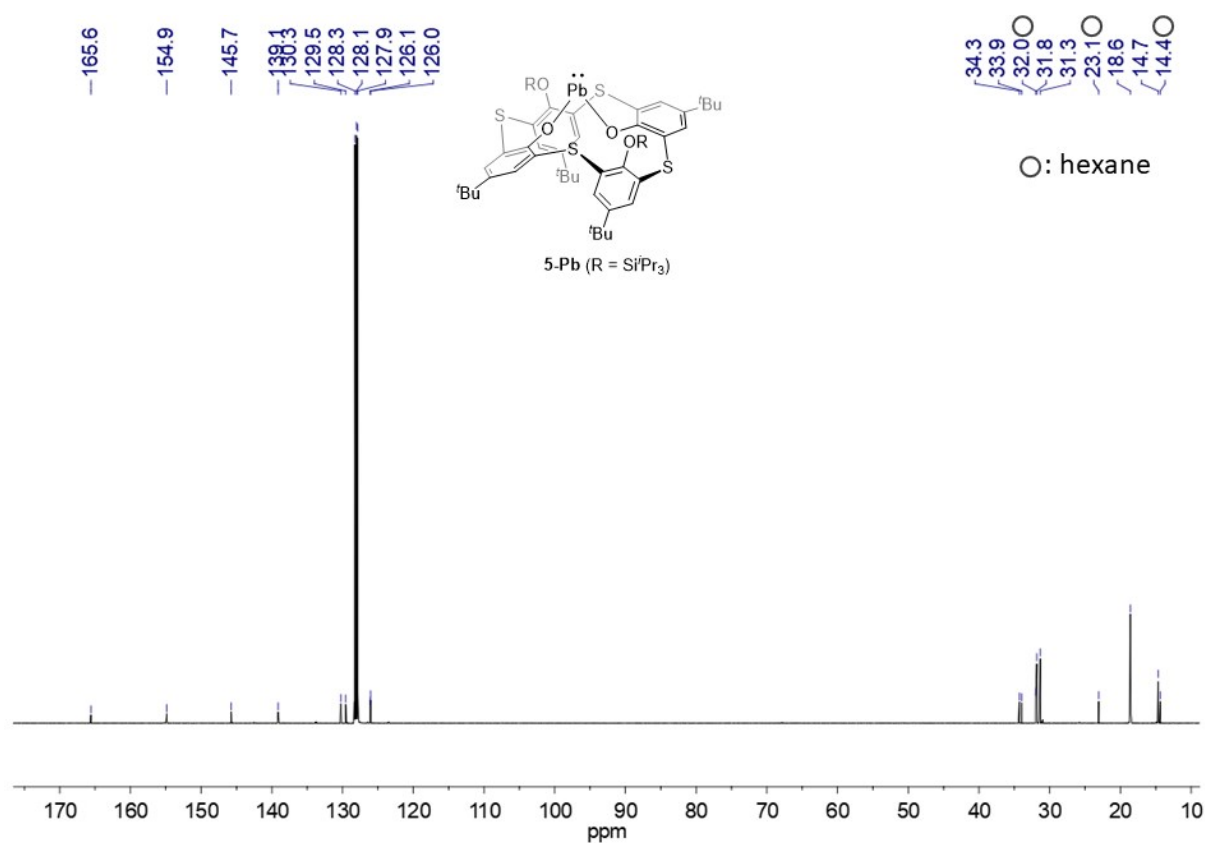

**Figure S16.**  $^{13}\text{C}\{^1\text{H}\}$  NMR spectrum of **5-Pb**.

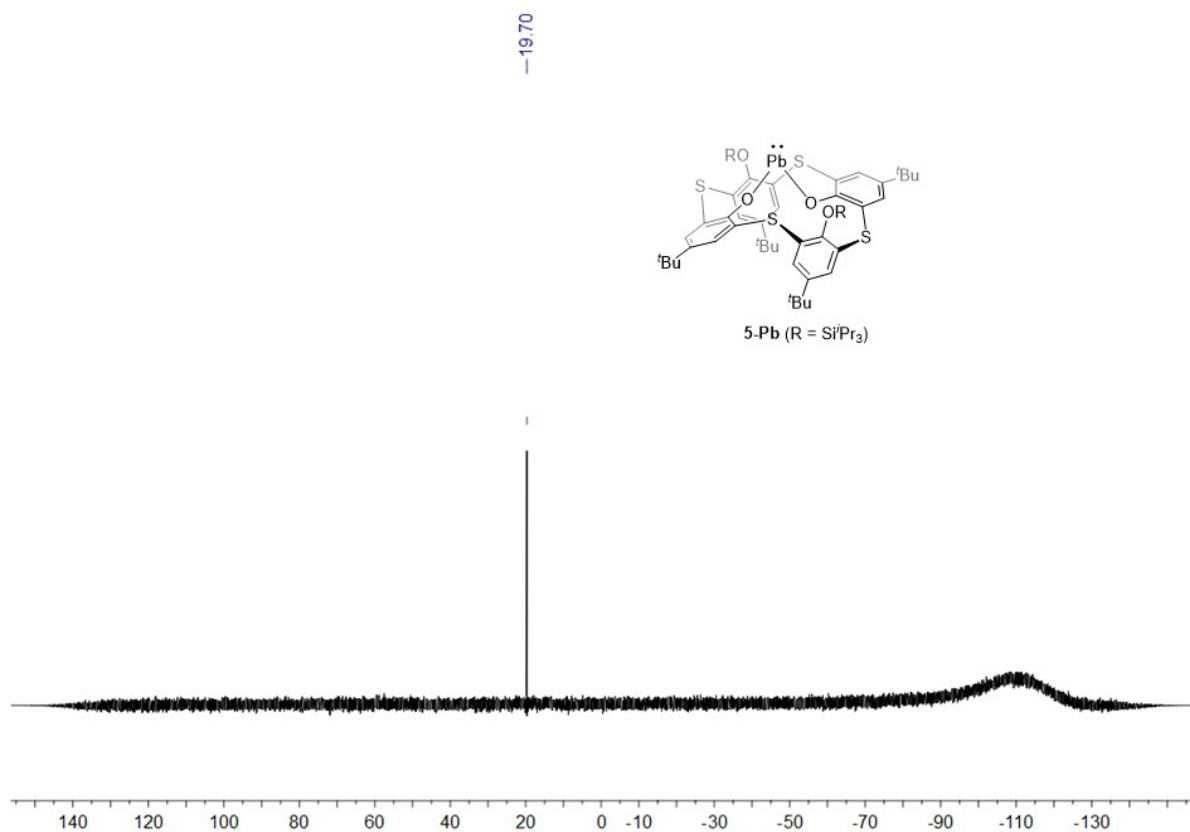

**Figure S17.**  $^{29}\text{Si}\{^1\text{H}\}$  NMR spectrum of **5-Pb**.

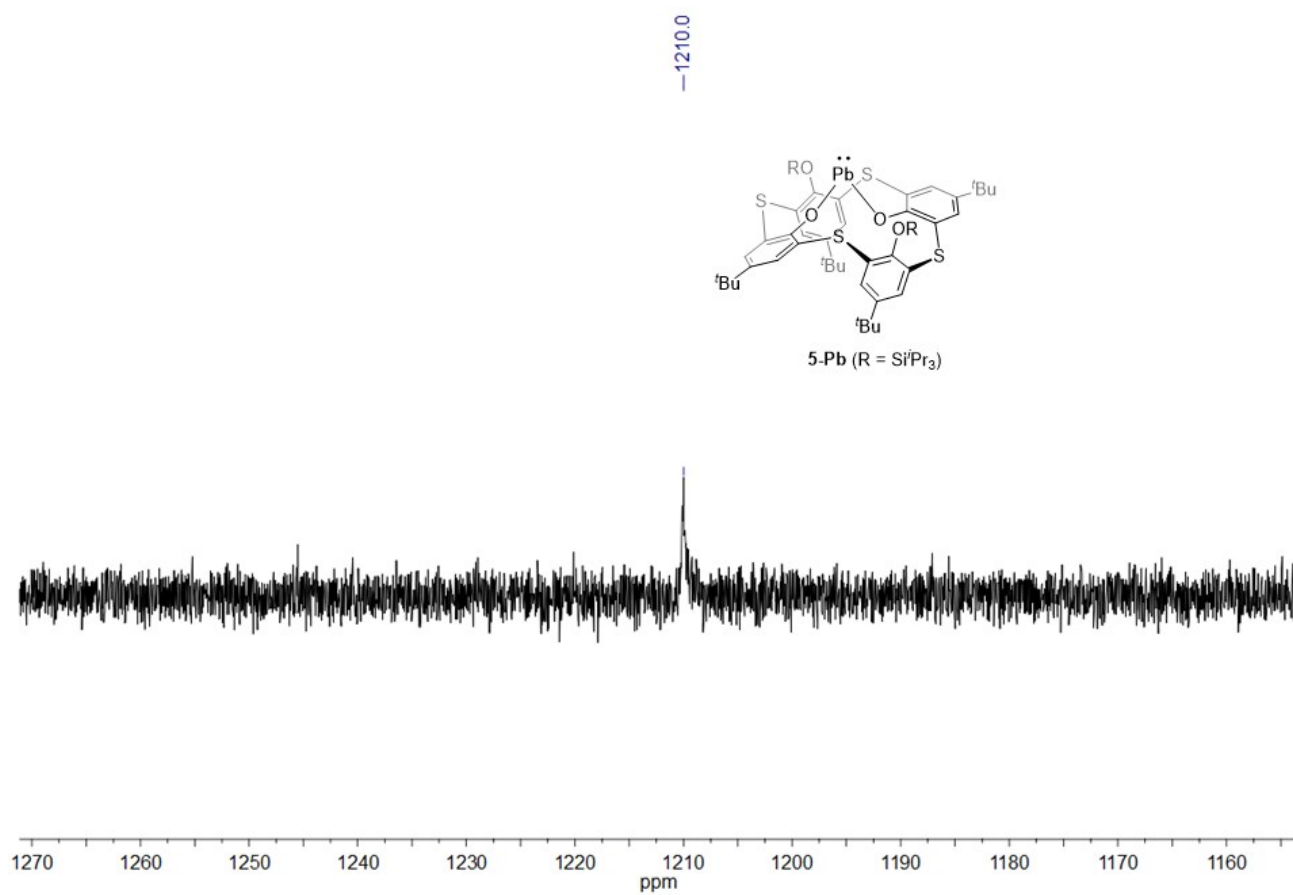

**Figure S18.**  $^{207}\text{Pb}$  NMR spectrum of **5-Pb**.

## 5. References

- (1) Jacobson, R. A., *Private Communication to Rigaku Corp.; Rigaku Corp.; Tokyo Japan* **1998**.
- (2) *Crystal Structure 4.0: Single Crystal Structure Analysis Package; Rigaku Corp.; Tokyo, Japan* **2000-2010**.
- (3) Sheldrick, G., Crystal structure refinement with SHELXL. *Acta Crystallogr. Sec. C* **2015**, 71, 3-8.
